# Supplementary material
Source: PubMed Central journal article supplement (PMC4707681)
Supplement: NIHMS737197-supplement-Supplement.pdf [file NIHMS737197-supplement-Supplement.pdf]

# Supplement to “A Modified Classification Tree Method for Personalized Medicine Decisions”

WAN-MIN TSAI, HEPING ZHANG, EUGENIA BUTA, STEPHANIE O’MALLEY AND RALITZA GUEORGUEVA

---

## 1. DATA GENERATION IN SIMULATION STUDY

### 1.1 Scenario with sizeable treatment-covariate interactions

**Design 1 (no noise).** We generated 1000 subjects in total and, according to the contingency table in Table 1, assigned 500 subjects to treatment  $A$  (250 with outcome  $Y = 0$  and 250 with outcome  $Y = 1$ ) and 500 to treatment  $B$  (250 with outcome  $Y = 0$  and 250 with outcome  $Y = 1$ ). We only describe in detail the covariate generation process for subjects on treatment  $A$ . A similar process was used to generate covariates for subjects on treatment  $B$ .

Among the 250 subjects assigned to treatment  $A$  and outcome 0, 126 subjects had a covariate  $X_1$  value generated that was  $\leq 0.5$  (drawn from a discrete uniform distribution on the grid from 0.01 to 0.5 by increments of 0.0001) and 124 had  $X_1 > 0.5$  (drawn from a discrete uniform distribution on the grid from 0.51 to 1.5 by increments of 0.0001). Similarly, among those assigned to treatment  $A$  and outcome 1, 224 had an  $X_1$  value generated that was  $\leq 0.5$  and 26 had  $X_1 > 0.5$ .

Among the 126 subjects assigned to treatment  $A$ , outcome 0, and  $X_1 \leq 0.5$ , 111 had  $X_3$  (ordinal categorical covariate) drawn from a discrete uniform distribution on 1 to 3 and 15 had  $X_3$  drawn from a discrete uniform distribution on 4 to 5. Among the 111 subjects assigned to treatment  $A$ , outcome 0,  $X_1 \leq 0.5$ , and  $X_3 \leq 3$ , we randomly selected 20 to get  $X_2 = 0$  and the rest (91 subjects) got  $X_2 = 1$ .

**Design 2 (some noise variables).** We added the following noise variables to the design 1 dataset: 10 continuous variables drawn from a standard normal distri-

bution rounded to 4 decimal places, 10 binary variables with probability of success 0.2, and one three-level nominal variable drawn from a discrete uniform distribution on 1 to 3. The noise variables are independent of each other, the outcome and covariates.

**Design 3 (many noise variables).** Following the approach used to generate data for Design 2, we created the Design 3 dataset by adding the following noise variables to the design 1 dataset: 75 continuous variables, 10 binary variables, 4 three-level nominal variables, 3 four-level nominal variables and 3 five-level nominal variables.

### 1.2 Scenario with small treatment-covariate interactions

We simulated data with small treatment-covariate interactions using Table 2 and the steps outlined above for generation of sizeable treatment-covariate interactions data.

### 1.3 Scenario with no treatment-covariate interactions

**Design 1 (no noise).** Data for 1000 subjects were generated according to the following logistic regression model with main effects only:  $\text{logit } P(Y = 1) = -1 + 0.3I(T = B) + 0.5X_1 + 0.5I(X_3 \geq 3) + 0.5X_2$ , where  $I$  represents the indicator function,  $X_1$  was drawn from a discrete uniform distribution on the grid from 0.51 to 1.5 by increments of 0.0001,  $X_2$  was drawn from a discrete uniform distribution on 0 to 1,  $X_3$  was drawn from a discrete uniform distribution on 1 to 5, and 500 subjects were assigned to each treatment ( $A$  and  $B$ ).

**Design 2 and 3.** We added noise using the same method as the one described above for sizeable interactions scenario.

Table 1. Contingency table for sizeable treatment-covariate interactions data generation.

| Y | Frequency | Treatment | Frequency | $X_1$      | Frequency | $X_3$    | Frequency | $X_2$ | Frequency |
|---|-----------|-----------|-----------|------------|-----------|----------|-----------|-------|-----------|
| 0 | 250       | A(=0)     | 500       | $\leq 0.5$ | 126       | $\leq 3$ | 111       | 0     | 20        |
|   |           |           |           |            |           |          |           | 1     | 91        |
|   |           |           |           |            |           |          |           | 0     | 10        |
|   |           |           |           |            |           |          |           | 1     | 5         |
|   |           |           |           |            |           |          |           | 0     | 40        |
|   |           |           |           | $> 0.5$    | 124       | $\leq 3$ | 80        | 0     | 40        |
|   |           |           |           |            |           |          |           | 1     | 40        |
|   |           |           |           |            |           |          |           | 0     | 27        |
|   |           |           |           |            |           |          |           | 1     | 17        |
|   |           |           |           |            |           |          |           | 0     | 60        |
| 1 | 250       |           |           | $\leq 0.5$ | 224       | $\leq 3$ | 89        | 0     | 60        |
|   |           |           |           |            |           |          |           | 1     | 29        |
|   |           |           |           |            |           |          |           | 0     | 10        |
|   |           |           |           |            |           |          |           | 1     | 125       |
|   |           |           |           |            |           |          |           | 0     | 10        |
|   |           |           |           | $> 0.5$    | 26        | $\leq 3$ | 20        | 0     | 10        |
|   |           |           |           |            |           |          |           | 1     | 10        |
|   |           |           |           |            |           |          |           | 0     | 3         |
|   |           |           |           |            |           |          |           | 1     | 3         |
|   |           |           |           |            |           |          |           | 0     | 74        |
| 0 | 250       | B(=1)     | 500       | $\leq 0.5$ | 224       | $\leq 3$ | 84        | 0     | 74        |
|   |           |           |           |            |           |          |           | 1     | 10        |
|   |           |           |           |            |           |          |           | 0     | 125       |
|   |           |           |           |            |           |          |           | 1     | 15        |
|   |           |           |           |            |           |          |           | 0     | 10        |
|   |           |           |           | $> 0.5$    | 26        | $\leq 3$ | 20        | 0     | 10        |
|   |           |           |           |            |           |          |           | 1     | 10        |
|   |           |           |           |            |           |          |           | 0     | 2         |
|   |           |           |           |            |           |          |           | 1     | 4         |
|   |           |           |           |            |           |          |           | 0     | 46        |
| 1 | 250       |           |           | $\leq 0.5$ | 126       | $\leq 3$ | 116       | 0     | 46        |
|   |           |           |           |            |           |          |           | 1     | 70        |
|   |           |           |           |            |           |          |           | 0     | 5         |
|   |           |           |           |            |           |          |           | 1     | 5         |
|   |           |           |           |            |           |          |           | 0     | 40        |
|   |           |           |           | $> 0.5$    | 124       | $\leq 3$ | 80        | 0     | 40        |
|   |           |           |           |            |           |          |           | 1     | 40        |
|   |           |           |           |            |           |          |           | 0     | 18        |
|   |           |           |           |            |           |          |           | 1     | 26        |
|   |           |           |           |            |           |          |           | 0     | 18        |

Table 2. Contingency table for small treatment-covariate interactions data generation.

| Y       | Frequency | Treatment | Frequency | $X_1$      | Frequency | $X_3$    | Frequency | $X_2$      | Frequency |          |     |   |    |
|---------|-----------|-----------|-----------|------------|-----------|----------|-----------|------------|-----------|----------|-----|---|----|
| 0       | 250       | A(=0)     | 500       | $\leq 0.5$ | 160       | $\leq 3$ | 100       | 0          | 50        |          |     |   |    |
|         |           |           |           |            |           | $> 3$    | 60        | 0          | 35        |          |     |   |    |
|         |           |           |           |            |           |          |           | 1          | 25        |          |     |   |    |
|         |           |           |           | $> 0.5$    | 90        | $\leq 3$ | 42        | 0          | 18        |          |     |   |    |
|         |           |           |           |            |           |          |           | 1          | 24        |          |     |   |    |
|         |           |           |           |            |           | $> 3$    | 48        | 0          | 24        |          |     |   |    |
|         |           |           |           | 1          | 250       |          |           | $\leq 0.5$ | 190       | $\leq 3$ | 100 | 0 | 30 |
|         |           |           |           |            |           |          |           |            |           | $> 3$    | 90  | 0 | 55 |
|         |           |           |           |            |           |          |           |            |           |          |     | 1 | 35 |
| $> 0.5$ | 60        | $\leq 3$  | 28        |            |           |          |           | 0          | 12        |          |     |   |    |
|         |           |           |           |            |           |          |           | 1          | 16        |          |     |   |    |
|         |           | $> 3$     | 32        |            |           |          |           | 0          | 16        |          |     |   |    |
| 0       | 250       | B(=1)     | 500       | $\leq 0.5$ | 175       | $\leq 3$ | 100       | 0          | 60        |          |     |   |    |
|         |           |           |           |            |           | $> 3$    | 75        | 0          | 40        |          |     |   |    |
|         |           |           |           |            |           |          |           | 1          | 29        |          |     |   |    |
|         |           |           |           | $> 0.5$    | 75        | $\leq 3$ | 40        | 0          | 46        |          |     |   |    |
|         |           |           |           |            |           |          |           | 1          | 20        |          |     |   |    |
|         |           |           |           |            |           | $> 3$    | 35        | 0          | 20        |          |     |   |    |
|         |           |           |           | 1          | 250       |          |           | $\leq 0.5$ | 175       | $\leq 3$ | 100 | 0 | 15 |
|         |           |           |           |            |           |          |           |            |           | $> 3$    | 75  | 0 | 60 |
|         |           |           |           |            |           |          |           |            |           |          |     | 1 | 40 |
| $> 0.5$ | 75        | $\leq 3$  | 40        |            |           |          |           | 0          | 31        |          |     |   |    |
|         |           |           |           |            |           |          |           | 1          | 44        |          |     |   |    |
|         |           | $> 3$     | 35        |            |           |          |           | 0          | 20        |          |     |   |    |
|         |           | 1         | 20        |            |           |          |           |            |           |          |     |   |    |
|         |           | 1         | 15        |            |           |          |           |            |           |          |     |   |    |
